# Supplementary material
Source: PubMed Central journal article supplement (PMC3731906)
Supplement: CJN.09130912_CJN09130912SupplementaryData.pdf [file CJN.09130912_CJN09130912SupplementaryData.pdf]

**Supplemental Table 1. Fracture Case Definitions<sup>1</sup>**

| <b>Number of Dx Codes &amp; Data Source</b> | <b>Sex</b> | <b>Dx Codes</b>                                            | <b>MR vs. Any Dx</b> | <b>Procedure Codes</b>                 | <b>Washout Period (months)<sup>a</sup></b> |
|---------------------------------------------|------------|------------------------------------------------------------|----------------------|----------------------------------------|--------------------------------------------|
| <b>Hip</b>                                  |            |                                                            |                      |                                        |                                            |
| 1 H                                         | F          | <i>ICD-9-CM: 820</i><br><i>ICD-10: S72.0-S72.2</i>         | MR                   | 91.04, 91.14, 91.34, 91.44, 93.5, 93.6 | 12                                         |
| 1 H                                         | M          | <i>ICD-9-CM: 820</i><br><i>ICD-10: S72.0-S72.2</i>         | Any                  | 91.04, 91.14, 91.34, 91.44, 93.5, 93.6 | 12                                         |
| <b>Wrist</b>                                |            |                                                            |                      |                                        |                                            |
| 1 H or 1 P                                  | Both       | <i>ICD-9-CM: 813</i><br><i>ICD-10: S52</i>                 | Any                  | 91.01, 91.31, 93.87, 07.53H, 07.53B    | 12                                         |
| <b>Vertebrae</b>                            |            |                                                            |                      |                                        |                                            |
| 1 H or 1 P                                  | Both       | <i>ICD-9-CM: 805</i><br><i>ICD-10: S22.0, S22.1, S32.0</i> | Any                  | Not used                               | 12                                         |

Abbreviations: Dx, diagnosis; F, female; M, male; H, hospital record; P, physician billing claim; MR, most responsible or primary diagnosis in hospital record

<sup>a</sup>Indicates fracture-free period prior to outcome of interest

<sup>1</sup> Lix LM, Azimaee M, Acan Osman B, Caetano P, Morin S, Metge C, Goltzman D, Kreiger N, Prior J, Leslie WD: Osteoporosis-related fracture case definitions for population-based administrative data. *BMC Public Health* 12: 1–10, 2012
